# Supplementary material for: Exploring the mode of action of dithranol therapy for psoriasis: a metabolomic analysis using HaCaT cells
Source: Royal Society of Chemistry journal article supplement (doi:10.1039/c4mb00739e), 2015-05-21
Supplement: c4mb00739e1.pdf [file c4mb00739e1.pdf]

### Supplementary Information

Partial least squares regression (PLSR) was performed in Matlab® scripting language, version R2014a (<http://www.mathworks.com>), on the preprocessed data prepared as detailed in the data analysis section of the main manuscript.

Two biological replicates were used to train the model and the remaining biological replicate was used to test the model. The results are shown in SI Figure 1 below. 2 latent variables with the lowest associated RMS error were used for the model, which reflects the low effect observed at the lowest dose concentrations. We observe a good linear trend with increasing concentrations of dithranol treatment.

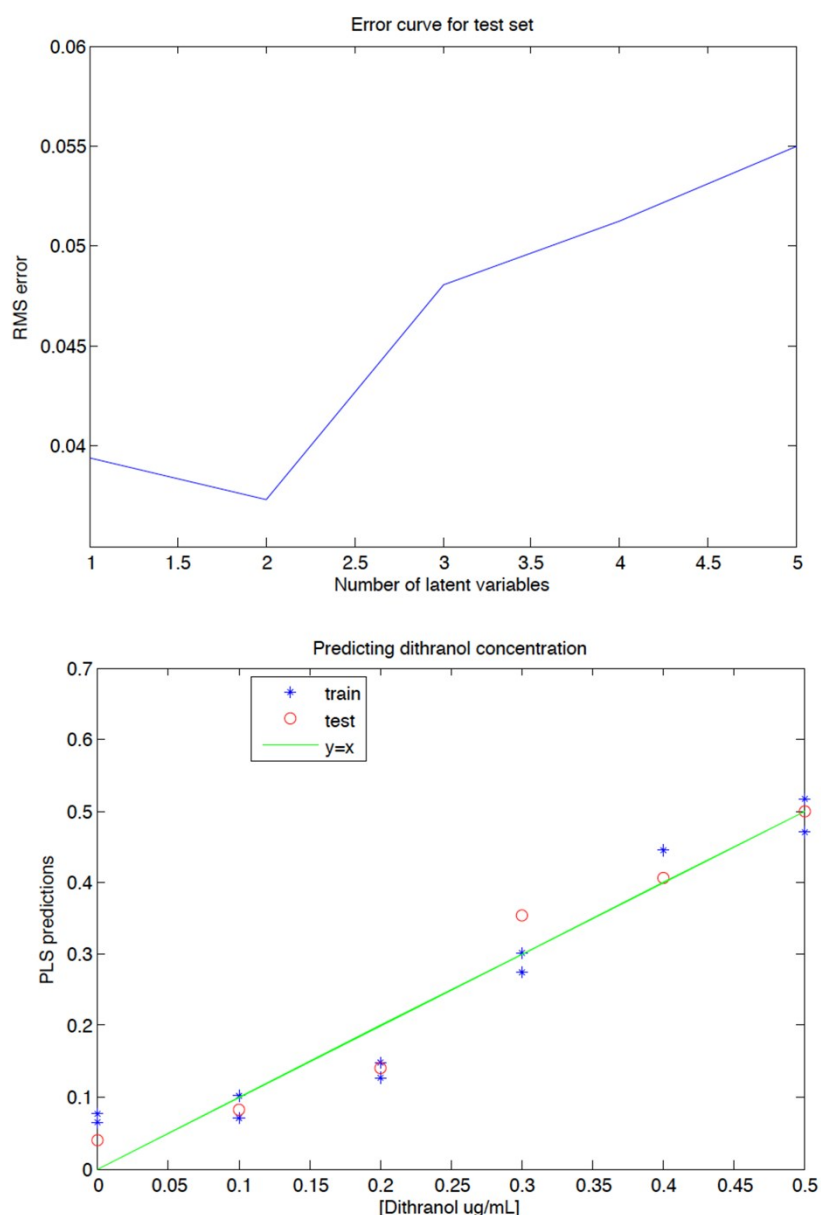

SI Figure 1: The error curve and the predicted dithranol concentration.
